# Supplementary material for: Facile synthesis of a carbon dots and silver nanoparticles (CDs/AgNPs) composite for antibacterial application
Source: Royal Society of Chemistry journal article supplement (doi:10.1039/d1ra02600c), 2021-01-01
Supplement: d1ra02600c1.pdf [file d1ra02600c1.pdf]

## Supporting Information

### **Facile synthesis of a carbon dots and silver nanoparticles(CDs/AgNPs) composite for antibacterial application**

Xinjing Wei<sup>a</sup>, Feng Cheng<sup>a</sup>, Yue Yao<sup>a</sup>, Xiaotong Yi<sup>a</sup>, Binxiao Wei<sup>a</sup>, Hongbin Li<sup>a</sup>, Yadong Wu<sup>a</sup>, Jinmei He<sup>a\*</sup>

<sup>a</sup> MIIT Key Laboratory of Critical Materials Technology for New Energy Conversion and Storage, School of Chemistry and Chemical Engineering, Harbin Institute of Technology, Harbin 150001, P.R. China

\*Corresponding authors: Jinmei He (E-mail: hejinmei@hit.edu.cn).

### **The morphological of bacteria**

The bacterial suspensions were incubated with CDs/AgNPs composite for 12 h at 37°C. Afterwards, the bacterial solution was centrifuged at 8000 rpm for 5 min and washed by PBS solution for three times. And then fixed by 2.5% glutaraldehyde for 4 h at 4°C in the refrigerator. After that, the bacterial solution was centrifuged and washed with PBS for three times. Followed by gradient dehydrating in a series of ethanol solutions (60%, 70%, 80%, 90% and 100%) for 10min in each step. Finally, the bacterial suspension was dropped onto the silicon wafer and coated with ultrathin gold by sputtering. Then the morphological of bacteria was observed by scanning electron microscope.

Figure

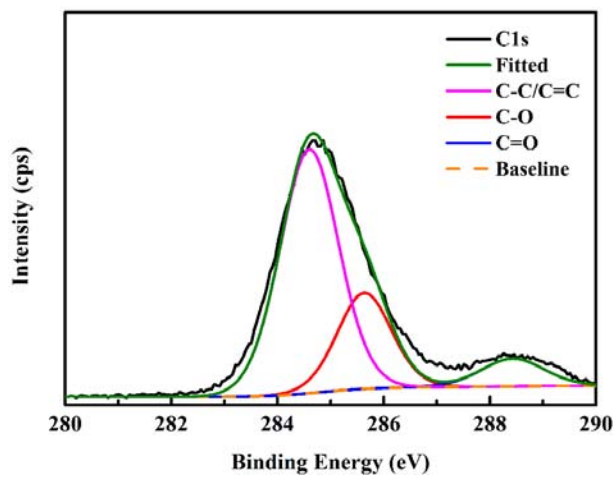

Figure S1 The C 1s spectrum of CDs.

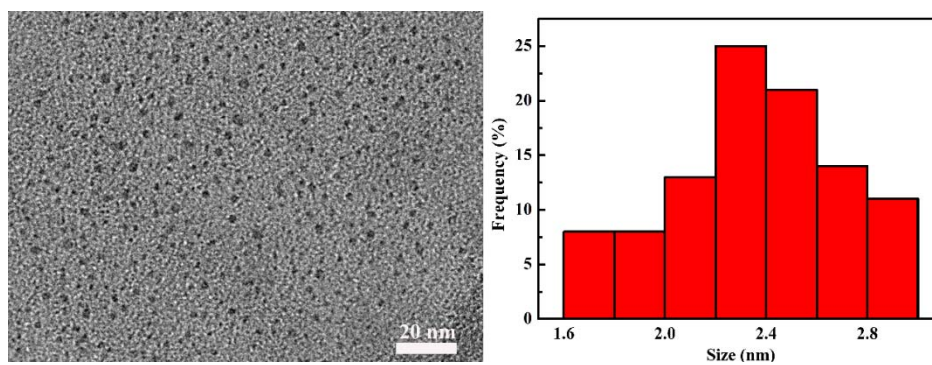

Figure S2. TEM image and particle size distribution histogram of CDs.

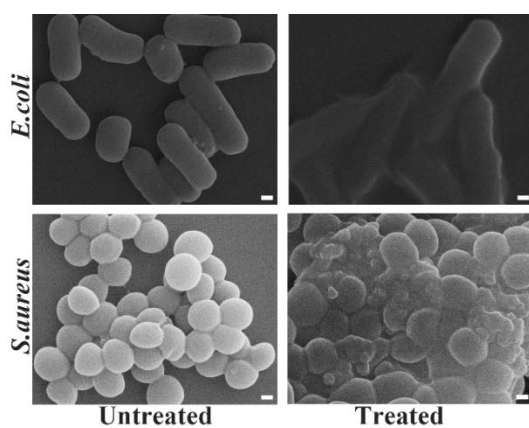

Figure S3. SEM image of *E. coli* and *S. aureus* bacteria. Untreated (left) and Treated with CDs/AgNPs composite (right). (Scale bar: 200 nm)

Table S1 The inhibition zone diameters of some reported antibacterial nanomaterials.

| Sample   | Inhibition zone (mm) |                  | Ref. |
|----------|----------------------|------------------|------|
|          | <i>E. coli</i>       | <i>S. aureus</i> |      |
| AgNPs    | 10.5                 | 9.5              | 1    |
| AgNPs    | 12                   | -                | 2    |
| GO/AgNPs | -                    | 9-21             | 3    |
| AgNPs    | 13                   | 18               | 4    |
| AgNPs    | 12.5                 | 11.5             | 5    |

## References

1. K. Anandalakshmi, J. Venugobal and V. Ramasamy, *Appl Nanosci*, 2015, **6**, 399-408.
2. S. Pirtarighat, M. Ghannadnia and S. Baghshahi, *Journal of Nanostructure in Chemistry*, 2018, **9**, 1-9.
3. M. R. Das, R. K. Sarma, S. C. Borah, R. Kumari, R. Saikia, A. B. Deshmukh, M. V. Shelke, P. Sengupta, S. Szunerits and R. Boukherroub, *Colloids and Surfaces B: Biointerfaces*, 2013, **105**, 128-136.
4. Z. Khan and S. A. Al-Thabaiti, *J Mol Liq*, 2019, **289**, 111102.
5. T. Dutta, N. N. Ghosh, M. Das, R. Adhikary, V. Mandal and A. P. Chattopadhyay, *J Environ Chem Eng*, 2020, **8**, 104019.
